# Supplementary material for: 2D nanosheet enabled thin film nanocomposite membranes for freshwater production – a review
Source: Royal Society of Chemistry journal article supplement (doi:10.1039/d1ma00256b), 2021-01-01
Supplement: d1ma00256b1.pdf [file d1ma00256b1.pdf]

## Supplementary Information for the manuscript

### Title

2D nanosheet enabled thin film nanocomposite membranes for freshwater production – a review

### Authors

Deepak Surendhra Mallya <sup>1\*</sup>, Ludovic F. Dumée <sup>2,3,4\*</sup>, Shobha Muthukumaran <sup>5</sup>, Weiwei Lei <sup>6</sup>, Kanagaratnam Baskaran <sup>1</sup>

### Affiliations

<sup>1</sup> School of Engineering, Deakin University, Waurn Ponds 3216, Australia; Email: [dmallya@deakin.edu.au](mailto:dmallya@deakin.edu.au); [basbaskaran@deakin.edu.au](mailto:basbaskaran@deakin.edu.au)

<sup>2</sup> Khalifa University, Department of Chemical Engineering, Abu Dhabi, United Arab Emirates

<sup>3</sup> Research and Innovation Center on CO<sub>2</sub> and Hydrogen, Khalifa University, Abu Dhabi, United Arab Emirates

<sup>4</sup> Center for Membrane and Advanced Water Technology, Khalifa University, Abu Dhabi, United Arab Emirates [ludovic.dumee@ku.ac.ae](mailto:ludovic.dumee@ku.ac.ae)

<sup>5</sup> College of Engineering and Science, Victoria University, Melbourne 14428, Australia; Email: [Shobha.Muthukumaran@vu.edu.au](mailto:Shobha.Muthukumaran@vu.edu.au)

<sup>6</sup> Institute of Frontier Materials, Deakin University, Geelong, Victoria 3220, Australia; Email: [weiwei.lei@deakin.edu.au](mailto:weiwei.lei@deakin.edu.au)

\*Corresponding authors: [dmallya@deakin.edu.au](mailto:dmallya@deakin.edu.au) (Deepak Surendhra Mallya), [ludovic.dumee@ku.ac.ae](mailto:ludovic.dumee@ku.ac.ae) (Ludovic F. Dumée); +971563842672

**Table S1 2D-enabled TFN RO membranes with data on 2D nanosheets, membrane surface and performance.**

| Entry | Nanosheet type and production method | Average size (S) and thickness (T) | Optimum concentration in (x) phase | Substrate membrane | Impact on membrane surface parameters (R - roughness, PAT - PA layer thickness, CA - contact angle, ZP - zeta potential at pH 7, ↑ - increases, ↓ - decreases | Membrane surface parameters                                | Pure water permeance of control membrane (LMH/bar) | Pure water permeance of TFN membrane (LMH/bar) | Performance enhancement (%) | NaCl rejection (%) | TFN membrane performance                                                                                                                                                                                                                                                                                                                                                                     | Ref.         |
|-------|--------------------------------------|------------------------------------|------------------------------------|--------------------|---------------------------------------------------------------------------------------------------------------------------------------------------------------|------------------------------------------------------------|----------------------------------------------------|------------------------------------------------|-----------------------------|--------------------|----------------------------------------------------------------------------------------------------------------------------------------------------------------------------------------------------------------------------------------------------------------------------------------------------------------------------------------------------------------------------------------------|--------------|
| 1     | GO, Hummers method                   | S = 70 – 140 nm                    | 0.0038 wt% (A)                     | PSf                | R ↓, PAT ↓, CA ↓, (-ve) ZP ↑                                                                                                                                  | R = 67 nm (average), ZP = -41.5 mV, CA = 49°, PAT = 248 nm | 0.59                                               | 1.07                                           | 81.36                       | 99.28 → 99.40      | <ul style="list-style-type: none"> <li>Biovolume of cells attached on the membrane decreased by approximately 98% compared to control membrane.</li> <li>Negligible difference in water permeance and salt rejection after chlorine exposure while control membrane reported 3 times increase in flux and 9% drop in salt rejection.</li> </ul>                                              | <sup>1</sup> |
| 2     | GO, modified Hummers method          |                                    | 0.01 wt% (A)                       | PSf                | R ↑, PAT ↓, CA ↓                                                                                                                                              | CA = 56°, PAT = 1.93 μm                                    | 1.42                                               | 1.97                                           | 38.73                       | 98.5 → 98          | <ul style="list-style-type: none"> <li>After multiple fouling-cleaning cycles the flux recovery of TFN membrane was 85 % when compared to 50 % for control and commercial membrane.</li> <li>After 500 ppm NaOCl chlorination for 10 hr significant increase of 20% in water flux was observed and the salt rejection decrease was negligible when compared to control membranes.</li> </ul> | <sup>2</sup> |
| 3     | GO, Hummers method                   | S = 360 nm, T = 2 nm               | 0.12 wt% (A)                       | PSf                | PAT ↑, CA ↓, (-ve) ZP ↑                                                                                                                                       |                                                            | 0.122                                              | 0.219                                          | 79.51                       | 97.54 → 86         | <ul style="list-style-type: none"> <li>Higher cytotoxicity of the membranes with cell viability percentage of approximately 33% when compared to pristine membrane with 87%.</li> </ul>                                                                                                                                                                                                      | <sup>3</sup> |
| 4     | GO, modified Hummers method          | S = 500 nm – 2 μm                  | 0.015 wt% (O)                      | PSf                | R ↓, CA ↓                                                                                                                                                     | R = 120 nm (RMS), CA = 58°, PAT = 200-300 nm               | 1.88                                               | 2.87                                           | 52.66                       | 95.7 → 93.8        | <ul style="list-style-type: none"> <li>Stable water permeance and salt rejection during 72 h long term filtration experiments.</li> </ul>                                                                                                                                                                                                                                                    | <sup>4</sup> |

|    |                                                                                    |                |                 |     |                              |                                                  |      |      |       |               |                                                                                                                                                                                                                                                                                                                                                      |    |
|----|------------------------------------------------------------------------------------|----------------|-----------------|-----|------------------------------|--------------------------------------------------|------|------|-------|---------------|------------------------------------------------------------------------------------------------------------------------------------------------------------------------------------------------------------------------------------------------------------------------------------------------------------------------------------------------------|----|
| 5  | GO, Staudenmaier method                                                            |                | 0.0053 wt% (O)  | PSf | R ↓, CA ↓, (-ve) ZP ↑        | R = 52 nm (RMS), ZP = -16 mV, CA = 68°           | 1.7  | 2.3  | 35.29 | 96 → 96       | <ul style="list-style-type: none"> <li>Adsorption of organic matter on the membrane surface was significantly reduced.</li> <li>Cell viability rate decreased to 52% when compared to control membrane with 85%.</li> </ul>                                                                                                                          | 5  |
| 6  | mGO, modified Hummers method and functionalisation                                 |                | 0.003 wt% (A)   | PSf | R ↓, PAT ↓, CA ↓             | R = 67.4 nm (RMS), CA = 48.2°, PAT = 50-80 nm    | 1.26 | 1.57 | 24.60 | 99.5 → 99.7   | <ul style="list-style-type: none"> <li>Exhibits bacterial killing ratios of 95.4% and 83.4% against E. coli and S. aureus which is much higher than 4.95 % and 2.48% of control membrane.</li> </ul>                                                                                                                                                 | 6  |
| 7  | Ag-GO                                                                              |                | 0.008 wt% (A)   | PSf | R ↓, CA ↓, (-ve) ZP ↓        | R = 42 nm (average), ZP = -28 mV, CA = 35°       | 1.47 | 1.35 | -8.16 | 96.7 → 94.8   | <ul style="list-style-type: none"> <li>Decrease in both permeance and salt rejection.</li> <li>FRR increased from 36.36% to 89.27% and irreversible fouling decreased from 62.62% to 10.72% respectively when compared to control membrane.</li> <li>85.6% reduction of live E coli cells after 1 h compared to 5.4% of control membrane.</li> </ul> | 7  |
| 8  | g-C <sub>3</sub> N <sub>4</sub> , Thermal decomposition                            | S = 60 – 70 nm | 0.015 wt% (A)   | PSf | R ↓, CA ↓                    | R = 18 nm (average), CA = 63.3°                  | 3    | 3    | 0.00  | 99 → 99.7     | <ul style="list-style-type: none"> <li>No significant improvement in anti-fouling and permeance performance</li> </ul>                                                                                                                                                                                                                               | 8  |
| 9  | aCN, Thermal decomposition and functionalisation                                   | S = 400nm      | 0.005 wt/v% (A) | PSf | R ↓, CA ↓, (-ve) ZP ↓        | R = 57.1 nm (RMS), ZP = -16 mV, CA = 40°         | 1.57 | 2.81 | 78.98 | 98.8 → 98.7   | <ul style="list-style-type: none"> <li>After 21 h fouling experiments with BSA and HA separately, the total fouling rate was 34.7% and 30.1% respectively when compared to 47.5% and 41% for the control membrane.</li> <li>FRR after BSA and HA fouling was 86.2% and 89.3% when compared to control membrane with 71.3% and 68%.</li> </ul>        | 9  |
| 10 | COOH-g-C <sub>3</sub> N <sub>4</sub> , Thermal decomposition and functionalisation |                | 0.05 wt% (A)    | PSf | R ↓, CA ↓, (-ve) ZP ↓        | R = 4.1 nm (RMS), CA = 58.5°, PAT = 250 - 300 nm | 3.96 | 6.12 | 54.55 | 96 → 98.1     | <ul style="list-style-type: none"> <li>The normalised flux after 120 min filtration with 100 ppm BSA was maintained at 1.5 times that of g-C<sub>3</sub>N<sub>4</sub> incorporated membranes.</li> </ul>                                                                                                                                             | 10 |
| 11 | g- C <sub>3</sub> N <sub>4</sub> , Thermal decomposition                           | S = 197 nm     | 0.01 wt/v% (A)  | PSf | R ↑, PAT ↑, CA ↑, (-ve) ZP ↑ | R = 173 nm (RMS), CA = 92.1°, PAT =              | 1.06 | 1.38 | 30.19 | 98.56 → 99.23 | <ul style="list-style-type: none"> <li>After exposure to 200 ppm BSA, the total fouling rate</li> </ul>                                                                                                                                                                                                                                              | 11 |

|    |                                                              |                                   |                            |     |                              |                                                 |      |      |        |             |                                                                                                                                                                                                                                                                                                                                               |    |
|----|--------------------------------------------------------------|-----------------------------------|----------------------------|-----|------------------------------|-------------------------------------------------|------|------|--------|-------------|-----------------------------------------------------------------------------------------------------------------------------------------------------------------------------------------------------------------------------------------------------------------------------------------------------------------------------------------------|----|
|    |                                                              |                                   |                            |     |                              | 80 nm                                           |      |      |        |             | decreased to 18.3% when compared to control membrane at 31.2%.                                                                                                                                                                                                                                                                                |    |
| 12 | BN(NH <sub>2</sub> ), Ball milling                           | S = 60 – 120 nm, T = 1.5 – 2.5 nm | 0.02 wt% (A)               | PES | R ↑, PAT ↓, CA ↑, (-ve) ZP ↑ | R = 110.9 nm (RMS), CA = 42°, PAT = 229.33 nm   | 3.19 | 4    | 25.39  | 96 → 96.4   | <ul style="list-style-type: none"> <li>HA fouling experiments demonstrated high flux recovery over 96% after one fouling/cleaning cycle when compared to 92% of the control membrane.</li> <li>After 24 h exposure to 2000 ppm NaOCl, the salt rejection was observed to be lowered by 2% when compared to control membrane at 6%.</li> </ul> | 12 |
| 13 | MoS <sub>2</sub> , Liquid exfoliation                        | S = 100 – 600 nm, T = 2 nm        | 0.01% (O)                  | PSf | R ↑, PAT ↓, CA ↑, (-ve) ZP ↑ | R = 80.6 nm (average), CA = 71°, PAT = 179 nm   | 5.07 | 6.2  | 22.29  | 98 → 99     | <ul style="list-style-type: none"> <li>Fouling experiments demonstrated that 91% of the normalized water flux was retained for 100 ppm BSA after 14 h testing when compared to 86% for the control membrane.</li> <li>Leaching of nanosheets during operation.</li> </ul>                                                                     | 13 |
| 14 | Ti <sub>3</sub> C <sub>2</sub> T <sub>x</sub> , Acid etching | S = 200 – 800 nm, T = 3.5 nm      | 0.015 wt% (A)              | PSf | R ↓, CA ↑, PAT ↓             | R = 90 nm (RMS)                                 | 1.7  | 2.53 | 48.82  | 98.6 → 98.5 | <ul style="list-style-type: none"> <li>After 6 h experimentations with 60 ppm BSA, the flux decline value was 11.1% when compared to control membrane with 22.72%.</li> <li>After chlorination tests, the salt rejection remained above 97% while control membranes rejection decreased to 94%.</li> </ul>                                    | 14 |
| 15 | TpPa, Microwave synthetic technique                          | S = 40 – 60 nm, T = 5 nm          | 50 µg cm <sup>-2</sup> (A) | PSf | R ↓, CA ↑, PAT ↓             | R = 75.5 nm (RMS), ZP = -13.50 mV, PAT = 230 nm | 0.7  | 2.2  | 214.29 | 96.3 → 97.7 | <ul style="list-style-type: none"> <li>Salt rejection retained over 95% after chlorine exposure experiments.</li> <li>High antimicrobial efficiency of 99.8% against E. Coli by surface contact inhibition.</li> </ul>                                                                                                                        | 15 |

**Table S2 2D-enabled TFN NF membranes with data on 2D nanosheets, membrane surface and performance.**

| Entry | Nanosheet type and production method               | Average size (S) and thickness (T) | Optimum concentration in (x) phase | Substrate membrane | Impact on membrane surface parameters (R - roughness, PAT - PA layer thickness, CA - contact angle, ZP - zeta potential at pH 7, ↑ - increases, ↓ - decreases) | Membrane surface parameters                                     | Pure water permeance of control membrane (LMH/bar) | Pure water permeance of TFN membrane (LMH/bar) | Performance enhancement (%) | Na <sub>2</sub> SO <sub>4</sub> rejection (%) | TFN membrane performance                                                                                                                                                                                                                                                                                                                                                                                                         | Ref. |
|-------|----------------------------------------------------|------------------------------------|------------------------------------|--------------------|----------------------------------------------------------------------------------------------------------------------------------------------------------------|-----------------------------------------------------------------|----------------------------------------------------|------------------------------------------------|-----------------------------|-----------------------------------------------|----------------------------------------------------------------------------------------------------------------------------------------------------------------------------------------------------------------------------------------------------------------------------------------------------------------------------------------------------------------------------------------------------------------------------------|------|
| 1     | GO, modified Hummers method                        |                                    | 0.2 wt% (A)                        | PSf                | R ↓, CA ↓, (-ve) ZP ↑                                                                                                                                          | R = 34.42 nm (RMS), ZP = -26 mV, CA = 65 °, PAT = 50 – 200 nm   | 0.12                                               | 1.48                                           | 1133.33                     | 97 → 96                                       | <ul style="list-style-type: none"> <li>Higher normalized flux observed during filtration studies with 200 mg/L BSA and 200 mg/L HA with 20 ppm when compared to control membrane.<br/>BSA cycle: Control = 68%<br/>TFN = 95%</li> <li>HA cycle: Control = 44%<br/>TFN = 90%</li> </ul>                                                                                                                                           | 16   |
| 2     | SGO, modified Hummers method and functionalisation |                                    | 0.3 wt% (A)                        | PSf                | R ↓, CA ↓, (-ve) ZP ↑                                                                                                                                          | R = 23.48 nm (RMS), ZP = -23.48 mV, CA = 39.12°, PAT = 113.8 nm | 1.27                                               | 2.37                                           | 87.3                        | 96.62 → 96.45                                 | <ul style="list-style-type: none"> <li>Fouling test with BSA and HA revealed enhanced performance towards BSA while deterioration for HA. Normalized flux reduced to 40% compared to control membrane at 46% for HA fouling. BSA fouling resulted in normalized flux at 70% compared to 38% for control membrane.</li> <li>Acid-base cleaning resulted in negligible flux reduction at 2% and similar salt rejection.</li> </ul> | 17   |
| 3     | GO-TETA, Hummers method and functionalisation      |                                    | 0.03 wt% (A)                       | PES                | R ↓, CA ↓, ZP ↑                                                                                                                                                | R = 3.2 nm (average), ZP = 5.1 mV, CA = 8.5°, PAT = 157 nm      | 8.3                                                | 12.2                                           | 46.99                       | 46.3 → 65.3                                   | <ul style="list-style-type: none"> <li>Very low salt rejection.</li> <li>FRR after fouling experiments with BSA achieved 95.3% compared to 89.3% for control membrane.</li> </ul>                                                                                                                                                                                                                                                | 18   |
| 4     | GO-EDA,                                            |                                    | 0.006                              | PSf                | R ↓, CA ↓, ZP ↑,                                                                                                                                               | R = 42.7 nm,                                                    | 7.72                                               | 11.92                                          | 54.40                       | 99 → 98.2                                     | <ul style="list-style-type: none"> <li>Antifouling performance</li> </ul>                                                                                                                                                                                                                                                                                                                                                        | 19   |

|    |                                                       |                              |                              |     |                              |                                                              |       |       |       |             |                                                                                                                                                                                                                                                                                                                  |                                                                                                                                                                                                                                                    |  |
|----|-------------------------------------------------------|------------------------------|------------------------------|-----|------------------------------|--------------------------------------------------------------|-------|-------|-------|-------------|------------------------------------------------------------------------------------------------------------------------------------------------------------------------------------------------------------------------------------------------------------------------------------------------------------------|----------------------------------------------------------------------------------------------------------------------------------------------------------------------------------------------------------------------------------------------------|--|
|    | modified Brodie method                                |                              | wt% (A)                      |     | PAT ↓                        | ZP = 25.5 mV, CA = 15°, PAT = 75.9 nm                        |       |       |       |             |                                                                                                                                                                                                                                                                                                                  | improved at pH = 3, however no notable difference was observed at pH= 6 compared to control membrane. <ul style="list-style-type: none"><li>Post chlorine exposure salt rejection decreased to 88% compared to 86% for control membrane.</li></ul> |  |
| 5  | GO-PEI, modified Brodie method                        |                              | 0.004 wt% (A)                | PSf | R ↓, CA ↓, ZP ↑, PAT ↓       | R = 60.9 nm (average), ZP = 41.2 mV, CA = 16°, PAT = 62.5 nm | 7.72  | 12.42 | 60.88 | 99 → 98.2   | <ul style="list-style-type: none"><li>Antifouling performance improved at pH = 3, however no notable difference was observed at pH = 6 compared to control membrane.</li><li>Post chlorine exposure salt rejection decreased to 96% compared to 86% for control membrane.</li></ul>                              | 19                                                                                                                                                                                                                                                 |  |
| 6  | MAH-GO, modified Hummers method and functionalisation | S = 400 – 800 nm, T = 1.3 nm | 0.006 wt% (A)                | PSf | R ↓, CA ↓, (-ve) ZP ↑, PAT ↓ | R = 5.43 nm (average), ZP = -33 mV                           | 4.67  | 8.22  | 76.7  | 98 → 97.6%  | <ul style="list-style-type: none"><li>Higher normalized flux observed during filtration studies with BSA.</li><li>Enhanced resistance to chlorine exposure.</li></ul>                                                                                                                                            | 20                                                                                                                                                                                                                                                 |  |
| 7  | g-C <sub>3</sub> N <sub>4</sub> , Thermal oxidation   |                              | 0.0025 wt% (A)               | PSf | R ↓, CA ↓, (-ve) ZP ↑        | R = 35.2 nm (RMS), ZP = -35 mV, CA = 24.6°                   | 10.45 | 18.8  | 79.90 | 90 → 84     | <ul style="list-style-type: none"><li>Normalized flux value was nearly twice that of the control membrane after 30 h fouling experiment with BSA.</li><li>Normalized fluxvalue was maintained approximatelyat 85% when compared to control membrane with 76% after 30 h filtration experiment with HA.</li></ul> | 21                                                                                                                                                                                                                                                 |  |
| 8  | g-C <sub>3</sub> N <sub>4</sub>                       | S = 200 nm                   | 16.4 µg cm <sup>-2</sup> (A) | PSf | R ↑, PAT ↑, CA ↓             | R = 39 nm (RMS), ZP = -20 mV                                 | 11    | 20.5  | 86.36 | 98.6 → 94.5 | <ul style="list-style-type: none"><li>High membrane stability after 8 h continuous filtration process.</li></ul>                                                                                                                                                                                                 | 22                                                                                                                                                                                                                                                 |  |
| 9  | BN(NH <sub>2</sub> ), Ball milling                    | S = 100 nm, T = 1.5 nm       | 0.004 wt% (A)                | PES | R ↑, PAT ↓, CA ↓, (-ve) ZP ↑ | R = 21.4 nm (average), ZP = -6.30 mV, CA = 30°               | 12.92 | 13.88 | 7.43  | 68.93       | <ul style="list-style-type: none"><li>97% normalized flux after filtration experimentation for 6 h with HA</li></ul>                                                                                                                                                                                             | 23                                                                                                                                                                                                                                                 |  |
| 10 | BN(NH <sub>2</sub> ), Ball milling                    | S = 100 – 200 nm, T = 5 nm   | 0.003 wt% studded            | PES | R ↓, CA ↓, (-ve) ZP ↑        | R = 6.13 (RMS), ZP = -34.85 mV, CA                           | 4.81  | 7.65  | 59.04 | 88.3        | <ul style="list-style-type: none"><li>Exhibited 59% enhancement in flux and 50% improvement in total fouling resistance when</li></ul>                                                                                                                                                                           | 24                                                                                                                                                                                                                                                 |  |

|    |                                                            |                                  |                                               |     |                       |                                              |       |       |        |             |                                                                                                                                                                                                                                                                                                                                                                                              |    |
|----|------------------------------------------------------------|----------------------------------|-----------------------------------------------|-----|-----------------------|----------------------------------------------|-------|-------|--------|-------------|----------------------------------------------------------------------------------------------------------------------------------------------------------------------------------------------------------------------------------------------------------------------------------------------------------------------------------------------------------------------------------------------|----|
|    |                                                            |                                  | on PA layer                                   |     |                       | = 25°, PAT = 53.56 nm                        |       |       |        |             | compared to control membranes and maintained NOM separation well above 90%.                                                                                                                                                                                                                                                                                                                  |    |
| 11 | BN(NH <sub>2</sub> ), Ball milling                         | S = 100 – 200 nm, T = 1.5 – 5 nm | 0.003 wt% (A) + 0.003 wt% studded on PA layer | PES | R ↑, CA ↓, (-ve) ZP ↑ | R = 12 nm (RMS), ZP = -70 mV, CA = 20°       | 7.2   | 12.15 | 68.75  |             | <ul style="list-style-type: none"> <li>Normalized flux of 95% after 6 h fouling experimentation which was higher than control membrane.</li> <li>NOM removal from surface water in terms of UV245 and DOC at 650% and 341% more than treatment plant.</li> <li>Better filtration performance in detrimental solution chemistry of low pH and high Ca<sup>2+</sup> concentrations.</li> </ul> | 25 |
| 12 | MoS <sub>2</sub> , Liquid exfoliation                      | S = 200 – 600 nm, T = 3 nm       | 0.01 wt/v% (O)                                | PSf | R ↑, CA ↓, (-ve) ZP ↑ | R = 30.4 nm (RMS), ZP = -32.8 mV, CA = 64°   | 3.4   | 7.8   | 129.41 | 92.5 → 94.4 | <ul style="list-style-type: none"> <li>After 16 h experimentation with saline solution, the flux reduction was 6.9% when compared to 25.6% decline in control membrane.</li> </ul>                                                                                                                                                                                                           | 26 |
| 13 | TA-MoS <sub>2</sub> , Liquid exfoliation                   | S = 37.41 nm, T = 1.35 nm        | 0.025 wt% (A)                                 | PES | R ↑, CA ↓, (-ve) ZP ↑ | R = 100.9 nm (RMS), ZP = -70 mV, PAT = 32 nm | 13.67 | 17    | 24.36  | 97 → 98.5   | <ul style="list-style-type: none"> <li>Normalized flux after 4 h experimentation with BSA was very similar to that of the control membrane in the range 55% to 60%.</li> <li>High flux and salt rejection above 98% retained after 120 h experimentation with saline solution.</li> </ul>                                                                                                    | 27 |
| 14 | TA-Fe <sup>3+</sup> -MoS <sub>2</sub> , Liquid exfoliation | S = 500 – 1500 nm, T = 5 – 6 nm  | 0.01 wt% (A)                                  | PSf | R ↑, CA ↑, PAT ↓      | R = 26.7 nm (RMS), CA = 38.5°, PAT = 75 nm   | 4.9   | 7.6   | 55.10  | 95.6 → 96.3 | <ul style="list-style-type: none"> <li>Increased salt rejection and permeance when compared to control membranes.</li> </ul>                                                                                                                                                                                                                                                                 | 28 |
| 15 | O-MoS <sub>2</sub> , Hummers method                        | S = 100 – 500 nm, T = 1.8 – 5 nm | 0.01 wt/v% (O)                                | PSf | R ↑, CA ↓, (-ve) ZP ↑ | R = 26.5 nm (RMS), ZP = -35 mV, CA = 41°     | 3.11  | 7.91  | 154.34 | 93.4 → 97.9 | <ul style="list-style-type: none"> <li>After 90 min experimentations with 500 mg/L BSA, the membranes exhibited normalized flux of 78%, while the control membrane exhibited 57%.</li> </ul>                                                                                                                                                                                                 | 29 |
| 16 | TpBD-NH <sub>2</sub> , Liquid exfoliation                  | S <10 μm, T = 4 nm               | 0.01 wt/v% (A)                                | PAN | R ↑                   | R = 21.7 nm (RMS), CA = 35°                  | 4.8   | 9.5   | 97.92  | 98 → 92     | <ul style="list-style-type: none"> <li>Water permeance boosted but the selectivity decreased.</li> </ul>                                                                                                                                                                                                                                                                                     | 30 |



**Table S3 Comparison of 2D enabled TFN membranes and challenges associated**

| <u>2D nanosheet material</u>        | <u>2D nanosheet production aspects</u>                                                                                                                                                                                    | <u>Characteristics of 2D enabled TFN membranes</u>                                                                                                                                                                        | <u>Challenges of 2D enabled TFN membranes</u>                                                                                                                                                                                                              | <u>Ref.</u> |
|-------------------------------------|---------------------------------------------------------------------------------------------------------------------------------------------------------------------------------------------------------------------------|---------------------------------------------------------------------------------------------------------------------------------------------------------------------------------------------------------------------------|------------------------------------------------------------------------------------------------------------------------------------------------------------------------------------------------------------------------------------------------------------|-------------|
| <u>GO</u>                           | <ul style="list-style-type: none"> <li>Scalable and high yield synthesis methods.</li> <li>Cheap and abundant available parent materials.</li> <li>Production of hazardous gas and wastewater during synthesis</li> </ul> | <ul style="list-style-type: none"> <li>Hydrophilicity</li> <li>Negative charge</li> <li>Antibacterial and organic fouling resistance</li> <li>Chlorine resistance</li> </ul>                                              | <ul style="list-style-type: none"> <li>Low stability of GO in aqueous media and higher temperature.</li> <li>Trade-off between permeance and selectivity.</li> <li>Lower impact as permeance and selectivity enhancers.</li> </ul>                         | 5, 27       |
| <u>g-C<sub>3</sub>N<sub>4</sub></u> | <ul style="list-style-type: none"> <li>Lower dispersion and stability in solvents</li> <li>Time consuming and low efficiency of nanosheet production.</li> </ul>                                                          | <ul style="list-style-type: none"> <li>Hydrophilicity</li> <li>Positive charge</li> <li>Chlorine resistance</li> <li>Permeance enhancer</li> </ul>                                                                        | <ul style="list-style-type: none"> <li>Trade-off between permeance and selectivity.</li> <li>Low compatibility with polymer matrix</li> </ul>                                                                                                              | 11, 21      |
| <u>BN</u>                           | <ul style="list-style-type: none"> <li>High cost of BN.</li> <li>High efficiency and scalable production method.</li> </ul>                                                                                               | <ul style="list-style-type: none"> <li>Hydrophilicity</li> <li>Negative charge</li> <li>Mechanical strength</li> <li>Chlorine resistance</li> </ul>                                                                       | <ul style="list-style-type: none"> <li>Trade-off between permeance and selectivity</li> <li>Low permeance enhancement</li> <li>Impact of amine functionalities overpowering BN.</li> </ul>                                                                 | 12, 23, 24  |
| <u>MoS<sub>2</sub></u>              | <ul style="list-style-type: none"> <li>High cost of MoS<sub>2</sub></li> <li>Use of hazardous solvents and time-consuming methods.</li> <li>Compatibility and stability issues.</li> </ul>                                | <ul style="list-style-type: none"> <li>Hydrophilicity</li> <li>Negative charge</li> <li>Permeance enhancer</li> <li>High selectivity retained</li> </ul>                                                                  | <ul style="list-style-type: none"> <li>Leaching of nanosheets due to poor compatibility and lack of functional groups.</li> <li>The performance of membranes varies accordingly when different functional groups are attached to 2D nanosheets.</li> </ul> | 13, 27, 28  |
| <u>MXene</u>                        | <ul style="list-style-type: none"> <li>Complex and costly synthesis methods.</li> <li>Use of strong and corrosive chemicals.</li> </ul>                                                                                   | <ul style="list-style-type: none"> <li>Hydrophilicity</li> <li>Negative charge</li> <li>Chlorine resistance</li> <li>Permeance enhancer</li> <li>High selectivity retained.</li> </ul>                                    | <ul style="list-style-type: none"> <li>Compatibility of nanosheets with polymer matrix.</li> <li>Stability issues when in contact with water.</li> <li>Possible leaching during operation.</li> </ul>                                                      | 14, 31      |
| <u>COF</u>                          | <ul style="list-style-type: none"> <li>High cost, complicated and time-consuming synthesis.</li> <li>Limited characterization data available</li> </ul>                                                                   | <ul style="list-style-type: none"> <li>Hydrophilicity</li> <li>Negative charge</li> <li>Permeance enhancer</li> <li>Chlorine resistance</li> <li>Antibacterial resistance.</li> <li>High selectivity retained.</li> </ul> | <ul style="list-style-type: none"> <li>Difficult to fabricate defect-free membrane.</li> <li>Large size of nanosheets disrupts the PA layer formation.</li> </ul>                                                                                          | 15          |



## References

1. H.-R. Chae, J. Lee, C.-H. Lee, I.-C. Kim and P.-K. Park, *Journal of Membrane Science*, 2015, **483**, 128-135.
2. M. E. Ali, L. Wang, X. Wang and X. Feng, *Desalination*, 2016, **386**, 67-76.
3. L. He, L. F. Dumée, C. Feng, L. Velleman, R. Reis, F. She, W. Gao and L. Kong, *Desalination*, 2015, **365**, 126-135.
4. J. Yin, G. Zhu and B. Deng, *Desalination*, 2016, **379**, 93-101.
5. A. Inurria, P. Cay-Durgun, D. Rice, H. Zhang, D.-K. Seo, M. L. Lind and F. Perreault, *Desalination*, 2019, **451**, 139-147.
6. Y. Zhang, H. Ruan, C. Guo, J. Liao, J. Shen and C. Gao, *Separation and Purification Technology*, 2020, **234**, 116017.
7. F. A. A. Ali, J. Alam, A. K. Shukla, M. Alhoshan, J. M. Khaled, W. A. Al-Masry, N. S. Alharbi and M. Alam, *Journal of Industrial and Engineering Chemistry*, 2019, **80**, 227-238.
8. S. S. Shahabi, N. Azizi and V. Vatanpour, *Separation and Purification Technology*, 2019, **215**, 430-440.
9. X. Gao, Y. Li, X. Yang, Y. Shang, Y. Wang, B. Gao and Z. Wang, *Journal of Materials Chemistry A*, 2017, **5**, 19875-19883.
10. S. S. Shahabi, N. Azizi, V. Vatanpour and N. Yousefimehr, *Separation and Purification Technology*, 2020, **235**, 116134.
11. M. Ge, X. Wang, S. Wu, Y. Long, Y. Yang and J. Zhang, *Separation and Purification Technology*, 2021, **258**, 117980.
12. R. Wang, Z.-X. Low, S. Liu, Y. Wang, S. Murthy, W. Shen and H. Wang, *Journal of Membrane Science*, 2020, 118389.
13. Y. Li, S. Yang, K. Zhang and B. Van der Bruggen, *Desalination*, 2019, **454**, 48-58.
14. X. Wang, Q. Li, J. Zhang, H. Huang, S. Wu and Y. Yang, *Journal of Membrane Science*, 2020, 118036.
15. L. Xu, B. Shan, C. Gao and J. Xu, *Journal of Membrane Science*, 2020, **593**, 117398.
16. S. Bano, A. Mahmood, S.-J. Kim and K.-H. Lee, *Journal of Materials Chemistry A*, 2015, **3**, 2065-2071.
17. Y. Kang, M. Obaid, J. Jang and I. S. Kim, *Desalination*, 2019, **470**, 114125.
18. N. Izadmehr, Y. Mansourpanah, M. Ulbricht, A. Rahimpour and M. R. Omidkhah, *Journal of Environmental Management*, 2020, **276**, 111299.
19. W. Shao, C. Liu, H. Ma, Z. Hong, Q. Xie and Y. Lu, *Applied Surface Science*, 2019, **487**, 1209-1221.
20. Q. Xie, W. Shao, S. Zhang, Z. Hong, Q. Wang and B. Zeng, *RSC advances*, 2017, **7**, 54898-54910.
21. J. Chen, Z. Li, C. Wang, H. Wu and G. Liu, *RSC advances*, 2016, **6**, 112148-112157.
22. Y. Liu, X. Wang, X. Gao, J. Zheng, J. Wang, A. Volodin, Y. F. Xie, X. Huang, B. Van der Bruggen and J. Zhu, *Journal of Membrane Science*, 2020, **596**, 117717.
23. S. Abdikheibari, W. Lei, L. F. Dumée, N. Milne and K. Baskaran, *Journal of Materials Chemistry A*, 2018, **6**, 12066-12081.
24. S. Abdikheibari, W. Lei, L. F. Dumée, A. J. Barlow and K. Baskaran, *Applied Surface Science*, 2019, **488**, 565-577.
25. S. Abdikheibari, L. F. Dumée, V. Jegatheesan, Z. Mustafa, P. Le-Clech, W. Lei and K. Baskaran, *Journal of Water Process Engineering*, 2020, **34**, 101160.
26. S. Yang and K. Zhang, *Journal of Membrane Science*, 2019, 117526.
27. M.-Q. Ma, C. Zhang, C.-Y. Zhu, S. Huang, J. Yang and Z.-K. Xu, *Journal of Membrane Science*, 2019, **591**, 117316.
28. H. Zhang, X.-Y. Gong, W.-X. Li, X.-H. Ma, C. Y. Tang and Z.-L. Xu, *Journal of Membrane Science*, 2020, 118605.
29. S. Yang, Q. Jiang and K. Zhang, *Journal of Membrane Science*, 2020, 118052.

30. Z. Zhang, C. Yin, G. Yang, A. Xiao, X. Shi, W. Xing and Y. Wang, *Journal of Membrane Science*, 2021, **618**, 118754.
31. M. Mozafari, A. Arabi Shamsabadi, A. Rahimpour and M. Soroush, *Advanced Materials Technologies*, 2021, 2001189.
